# Supplementary material for: Acceptance of COVID-19 Vaccination during the COVID-19 Pandemic in China
Source: Vaccines (Basel). 2020 Aug 27;8(3):482. doi: 10.3390/vaccines8030482 (PMC7565574; doi:10.3390/vaccines8030482)
Supplement: Supplementary file 1 [file vaccines-08-00482-s001.pdf]

## Article

# Acceptance of COVID-19 Vaccination during the COVID-19 Pandemic in China

## Supplementary Materials

**Table S1.** Comparison of baseline characteristics between the vaccine demand group and vaccine delay group.

| Items                                                | Vaccine Demand Group N (%) | Vaccine Delay Group N (%) | <i>p</i> -Value |
|------------------------------------------------------|----------------------------|---------------------------|-----------------|
| Age group                                            |                            |                           |                 |
| 18–25                                                | 186 (19.0)                 | 253 (28.1)                |                 |
| 26–30                                                | 192 (19.6)                 | 174 (19.4)                |                 |
| 31–40                                                | 272 (27.8)                 | 216 (24.0)                |                 |
| 41–50                                                | 246 (25.1)                 | 210 (23.4)                |                 |
| 51 and above                                         | 84 (8.6)                   | 46 (5.1)                  | <0.001          |
| Gender                                               |                            |                           |                 |
| Female                                               | 501 (51.1)                 | 521 (58.0)                |                 |
| Male                                                 | 479 (48.9)                 | 378 (42.0)                | 0.003           |
| Highest level of education                           |                            |                           |                 |
| Middle school and below                              | 60 (6.1)                   | 48 (5.3)                  |                 |
| High school                                          | 314 (32.0)                 | 293 (32.6)                |                 |
| Associate or bachelor                                | 546 (55.7)                 | 496 (55.2)                |                 |
| Master and above                                     | 60 (6.1)                   | 62 (6.9)                  | 0.800           |
| Marriage status                                      |                            |                           |                 |
| Married                                              | 725 (74.0)                 | 539 (60.0)                |                 |
| Others (single, divorced or widowed )                | 255 (26.0)                 | 360 (40.0)                | <0.001          |
| Location                                             |                            |                           |                 |
| Central                                              | 265 (27.0)                 | 224 (24.9)                |                 |
| East                                                 | 553 (56.4)                 | 531 (59.1)                |                 |
| West                                                 | 162 (16.5)                 | 144 (16.0)                | 0.483           |
| Region                                               |                            |                           |                 |
| Rural                                                | 210 (21.4)                 | 178 (19.8)                |                 |
| Urban                                                | 770 (78.6)                 | 721 (80.2)                | 0.384           |
| Employment status                                    |                            |                           |                 |
| Employed                                             | 810 (82.7)                 | 701 (78.0)                |                 |
| Unemployed                                           | 170 (17.3)                 | 198 (22.0)                | 0.011           |
| Health status                                        |                            |                           |                 |
| Good and above (good, very good)                     | 754 (76.9)                 | 653 (72.6)                |                 |
| Fair or below (fair, poor, very poor)                | 226 (23.1)                 | 246 (27.4)                | 0.032           |
| Total family income in 2019                          |                            |                           |                 |
| ≤ CNY 50,000 (USD 7246)                              | 125 (12.8)                 | 117 (13.0)                |                 |
| CNY 50,000–100,000 (USD 7246–14,492)                 | 254 (25.9)                 | 236 (26.3)                |                 |
| CNY 100,000–150,000 (USD 14,492–21,739)              | 233 (23.8)                 | 238 (26.5)                |                 |
| CNY 150,000–200,000 (USD 21,739–28,986)              | 180 (18.4)                 | 154 (17.1)                |                 |
| CNY 200,000–300,000 (USD 28,986–43,478)              | 115 (11.7)                 | 102 (11.3)                |                 |
| ≥ CNY 300,000 (USD 43,478)                           | 73 (7.4)                   | 52 (5.8)                  | 0.575           |
| There are confirmed or suspected cases in the county |                            |                           |                 |
| Yes                                                  | 723 (73.8)                 | 702 (78.1)                |                 |
| No or not clear                                      | 257 (26.2)                 | 197 (21.9)                | 0.029           |
| Perceived risk of infection                          |                            |                           |                 |
| High or very high                                    | 145 (14.8)                 | 86 (9.6)                  |                 |
| Fair                                                 | 265 (27.0)                 | 263 (29.3)                |                 |
| Low or very low                                      | 570 (58.2)                 | 550 (61.2)                | 0.003           |
| Pandemic impact on daily life                        |                            |                           |                 |
| Large or very large                                  | 679 (69.3)                 | 588(65.4)                 |                 |
| Fair                                                 | 233 (23.8)                 | 214(23.8)                 |                 |
| Small or very small                                  | 68 (6.9)                   | 97(10.8)                  | 0.011           |
| Pandemic impact on work                              |                            |                           |                 |

|                                                                                                                                                |            |            |        |
|------------------------------------------------------------------------------------------------------------------------------------------------|------------|------------|--------|
| Large or very large                                                                                                                            | 663 (72.8) | 580 (68.2) |        |
| Fair                                                                                                                                           | 174 (19.1) | 178 (20.9) |        |
| Small or very small                                                                                                                            | 74 (8.1)   | 92 (10.8)  | 0.066  |
| Pandemic impact on income                                                                                                                      |            |            |        |
| Large or very large                                                                                                                            | 465 (55.6) | 374 (52.2) |        |
| Fair                                                                                                                                           | 233 (27.8) | 194 (27.1) |        |
| Small or very small                                                                                                                            | 139 (16.6) | 148 (20.7) | 0.116  |
| Received vaccination against influenza in the past season                                                                                      |            |            |        |
| Yes                                                                                                                                            | 197 (20.1) | 94 (10.5)  |        |
| No                                                                                                                                             | 783 (79.9) | 805 (89.5) | <0.001 |
| Refused vaccination of a certain type of vaccine in the past                                                                                   |            |            |        |
| Yes                                                                                                                                            | 191 (19.5) | 208 (23.1) |        |
| No                                                                                                                                             | 789 (80.5) | 691 (76.9) | 0.053  |
| COVID-19 vaccination is an effective way to prevent and control COVID-19                                                                       |            |            |        |
| Yes                                                                                                                                            | 919 (93.8) | 812 (90.3) |        |
| No                                                                                                                                             | 61 (6.2)   | 87 (9.7)   | 0.006  |
| Doctor's recommendation is an important factor in vaccination decision-making                                                                  |            |            |        |
| Yes                                                                                                                                            | 880 (89.8) | 704 (78.3) |        |
| No                                                                                                                                             | 100 (10.2) | 195 (21.7) | <0.001 |
| Vaccine convenience (vaccination method, frequency, distance to vaccination sites, etc.) is an important factor in vaccination decision-making |            |            |        |
| Yes                                                                                                                                            | 714 (72.9) | 732 (81.4) |        |
| No                                                                                                                                             | 266 (27.1) | 167 (18.6) | <0.001 |
| Vaccine price is an important factor in vaccination decision-making                                                                            |            |            |        |
| Yes                                                                                                                                            | 539 (55.0) | 584 (65.0) |        |
| No                                                                                                                                             | 441 (45.0) | 315 (35.0) | <0.001 |

Notes: *p*-values of Chi-square test to check the significance of the differences among categories.

**Table S2.** Influencing factors on vaccination acceptance between the vaccine demand group and vaccine delay group, by including significant factors at the 10% level of the Chi-squared test into the multivariate logistic regression.

| Characteristics                                      | OR   | SE   | <i>p</i> -Value | 95%CI     |
|------------------------------------------------------|------|------|-----------------|-----------|
| Age group                                            |      |      |                 |           |
| 18–25                                                | Ref  |      |                 |           |
| 26–30                                                | 1.11 | 0.22 | 0.60            | 0.75–1.63 |
| 31–40                                                | 0.99 | 0.21 | 0.95            | 0.66–1.49 |
| 41–50                                                | 1.04 | 0.22 | 0.87            | 0.68–1.56 |
| > 51                                                 | 1.59 | 0.44 | 0.09            | 0.93–2.73 |
| Gender                                               |      |      |                 |           |
| Female                                               | Ref  |      |                 |           |
| Male                                                 | 1.26 | 0.12 | 0.02            | 1.03–1.53 |
| Marriage status                                      |      |      |                 |           |
| Others (single, divorced or widowed)                 | Ref  |      |                 |           |
| Married                                              | 1.67 | 0.25 | <0.001          | 1.24–2.24 |
| Employment status                                    |      |      |                 |           |
| Unemployed                                           | Ref  |      |                 |           |
| Employed                                             | 0.98 | 0.20 | 0.90            | 0.66–1.45 |
| Health status                                        |      |      |                 |           |
| Fair or below (fair, poor, very poor)                | Ref  |      |                 |           |
| Good and above (good, very good)                     | 1.13 | 0.13 | 0.28            | 0.90–1.42 |
| There are confirmed or suspected cases in the county |      |      |                 |           |
| No or not clear                                      | Ref  |      |                 |           |
| Yes                                                  | 0.70 | 0.08 | <0.001          | 0.55–0.88 |
| Perceived risk of infection                          |      |      |                 |           |
| Fair                                                 | Ref  |      |                 |           |
| High or very high                                    | 1.46 | 0.25 | 0.03            | 1.05–2.04 |
| Small or very small                                  | 1.01 | 0.11 | 0.94            | 0.81–1.26 |
| Pandemic impact on daily life                        |      |      |                 |           |
| Fair                                                 | Ref  |      |                 |           |
| Large or very large                                  | 1.00 | 0.12 | 0.97            | 0.79–1.28 |

|                                                                                                                                                |      |      |        |           |
|------------------------------------------------------------------------------------------------------------------------------------------------|------|------|--------|-----------|
| Small or very small                                                                                                                            | 0.66 | 0.14 | 0.04   | 0.44–0.99 |
| Pandemic impact on work                                                                                                                        |      |      |        |           |
| Fair                                                                                                                                           | Ref  |      |        |           |
| Large or very large                                                                                                                            | 1.05 | 0.14 | 0.70   | 0.81–1.37 |
| Small or very small                                                                                                                            | 0.82 | 0.17 | 0.35   | 0.55–1.24 |
| Received vaccination against influenza in the past season                                                                                      |      |      |        |           |
| No                                                                                                                                             | Ref  |      |        |           |
| Yes                                                                                                                                            | 1.89 | 0.27 | <0.001 | 1.43–2.50 |
| Refused vaccination of a certain type of vaccine in the past                                                                                   |      |      |        |           |
| No                                                                                                                                             | Ref  |      |        |           |
| Yes                                                                                                                                            | 0.80 | 0.10 | 0.07   | 0.63–1.02 |
| COVID-19 vaccination is an effective way to prevent and control COVID-19                                                                       |      |      |        |           |
| No                                                                                                                                             | Ref  |      |        |           |
| Yes                                                                                                                                            | 1.55 | 0.29 | 0.02   | 1.08–2.23 |
| Doctor's recommendation is an important factor in vaccination decision-making                                                                  |      |      |        |           |
| No                                                                                                                                             | Ref  |      |        |           |
| Yes                                                                                                                                            | 2.25 | 0.3  | <0.001 | 1.71–2.97 |
| Vaccine convenience (vaccination method, frequency, distance to vaccination sites, etc.) is an important factor in vaccination decision-making |      |      |        |           |
| No                                                                                                                                             | Ref  |      |        |           |
| Yes                                                                                                                                            | 0.71 | 0.09 | 0.01   | 0.56–0.91 |
| Vaccine price is an important factor in vaccination decision-making                                                                            |      |      |        |           |
| No                                                                                                                                             | Ref  |      |        |           |
| Yes                                                                                                                                            | 0.75 | 0.08 | 0.01   | 0.61–0.92 |

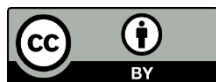

© 2020 by the authors. Licensee MDPI, Basel, Switzerland. This article is an open access article distributed under the terms and conditions of the Creative Commons Attribution (CC BY) license (<http://creativecommons.org/licenses/by/4.0/>).
